# Supplementary material
Source: PubMed Central journal article supplement (PMC4135601)
Supplement: MCB.00491-14_zmb999100534so1.pdf [file MCB.00491-14_zmb999100534so1.pdf]

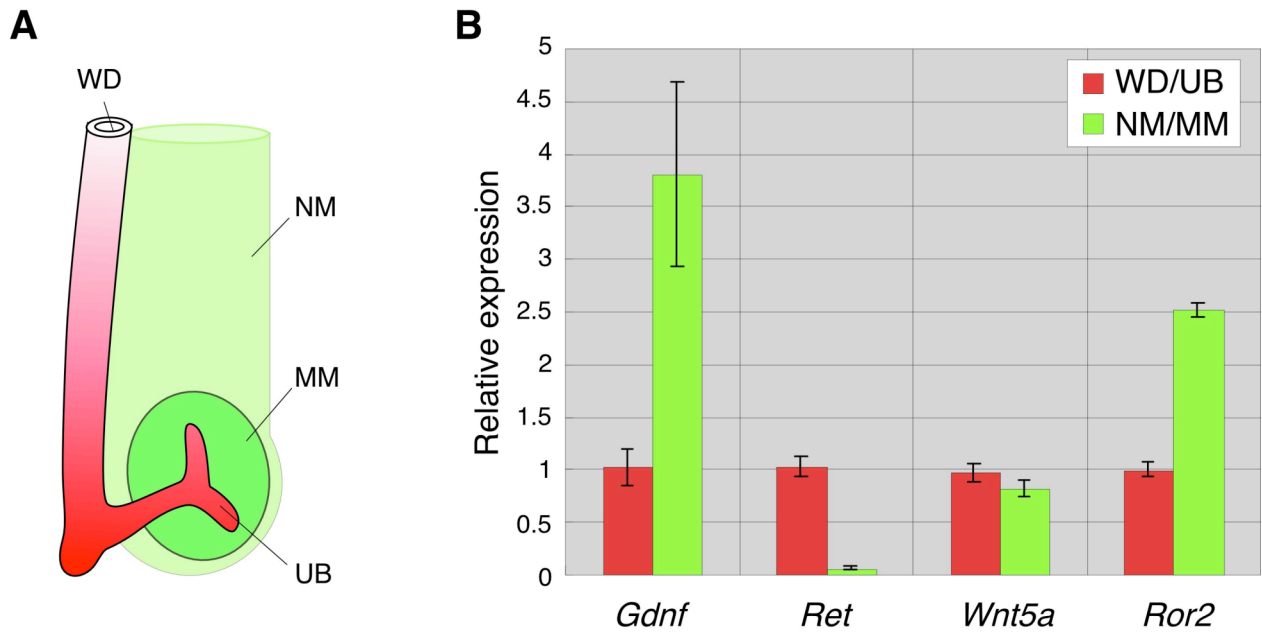

**Figure S1.** Quantitative RT-PCR analysis for *Wnt5a* and *Ror2*. (A) A schematic diagram of kidney tissues at E11.5. WD, Wolffian duct; UB, ureteric bud; NM, nephrogenic mesenchyme; MM, metanephric mesenchyme. (B) The kidney epithelia (WD and UB) and mesenchymes (NM and MM) were separated and subjected to quantitative RT-PCR analysis for *Wnt5a* and *Ror2*. *Gdnf* and *Ret* were also measured as markers for the MM and WD/UB, respectively.

*Ror2*<sup>-/-</sup>

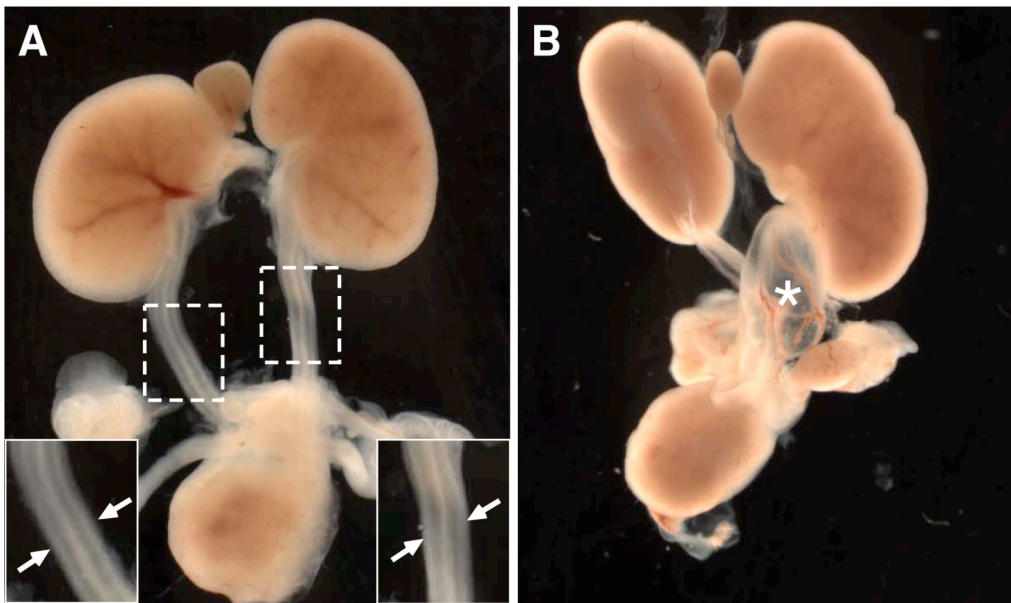

**Figure S2.** Bilateral duplicated ureters (A) and hydroureter (B) observed in *Ror2*-deficient embryos at E18.5. The insets in (A) show magnified views of the boxed regions with duplicated ureters (arrows). The asterisk in (B) indicates hydroureter.

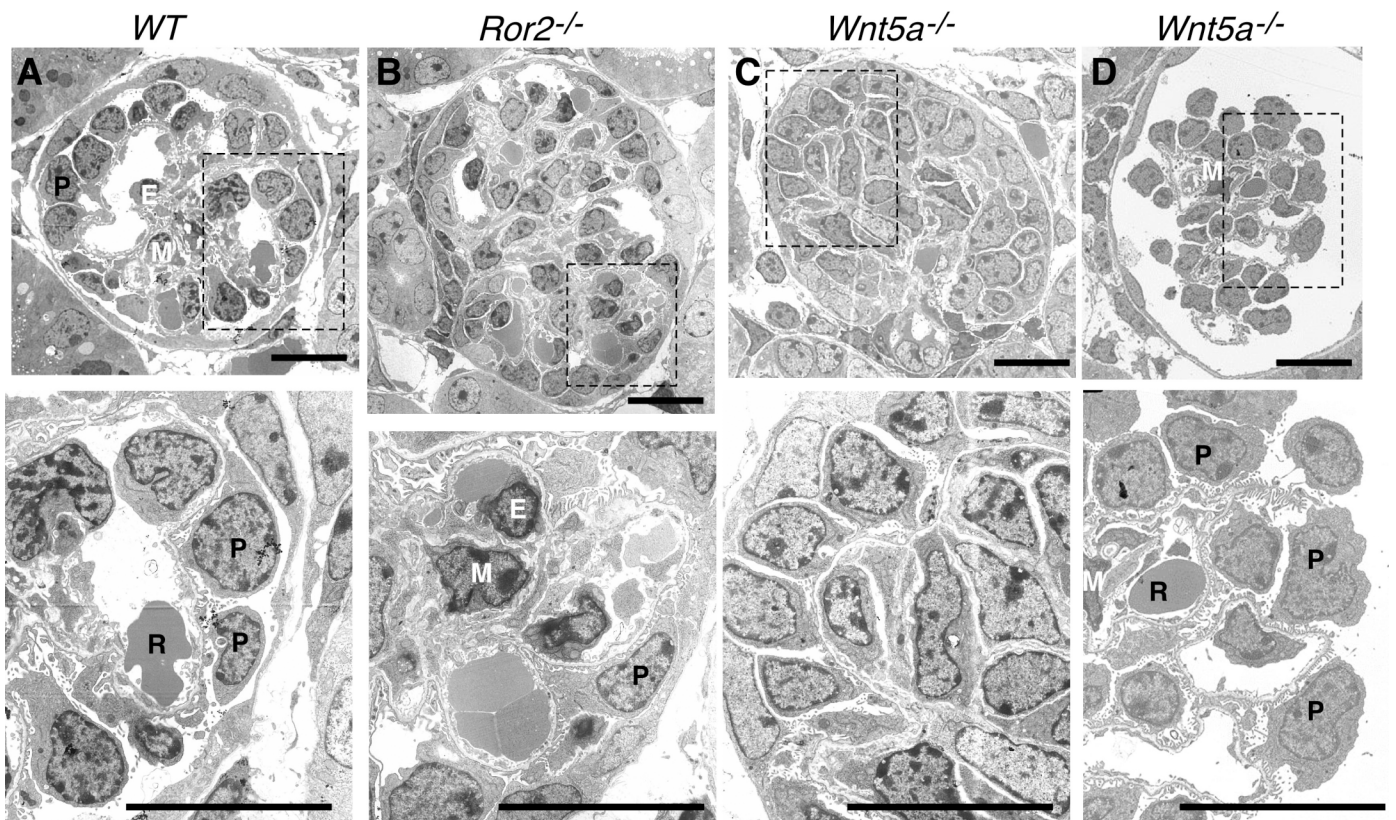

**Figure S3.** Transmission electron microscopy of the renal corpuscles in wild-type kidneys (A), *Ror2*<sup>-/-</sup> kidneys (B), and *Wnt5a*<sup>-/-</sup> kidneys with (C) and without (D) severe hydronephrosis at E18.5. Lower panels show high magnification view of the boxed region in the upper panels. E, endothelium; P, podocyte; R, red blood cell; M, mesangial cell. Size bar, 10 μm.

**A**

| Genotype                                                       | Kidney phenotypes |                |                |
|----------------------------------------------------------------|-------------------|----------------|----------------|
|                                                                | Single ureter     | Double ureter  | Agenesis       |
| <i>Ror2</i> <sup>+/-</sup> ; <i>Wnt5a</i> <sup>+/-</sup> (n=7) | 7                 | 0              | 0              |
| <i>Ror2</i> <sup>-/-</sup> ; <i>Wnt5a</i> <sup>+/+</sup> (n=5) | 3                 | 2 <sup>a</sup> | 0              |
| <i>Ror2</i> <sup>-/-</sup> ; <i>Wnt5a</i> <sup>+/-</sup> (n=7) | 1                 | 2 <sup>a</sup> | 4 <sup>b</sup> |

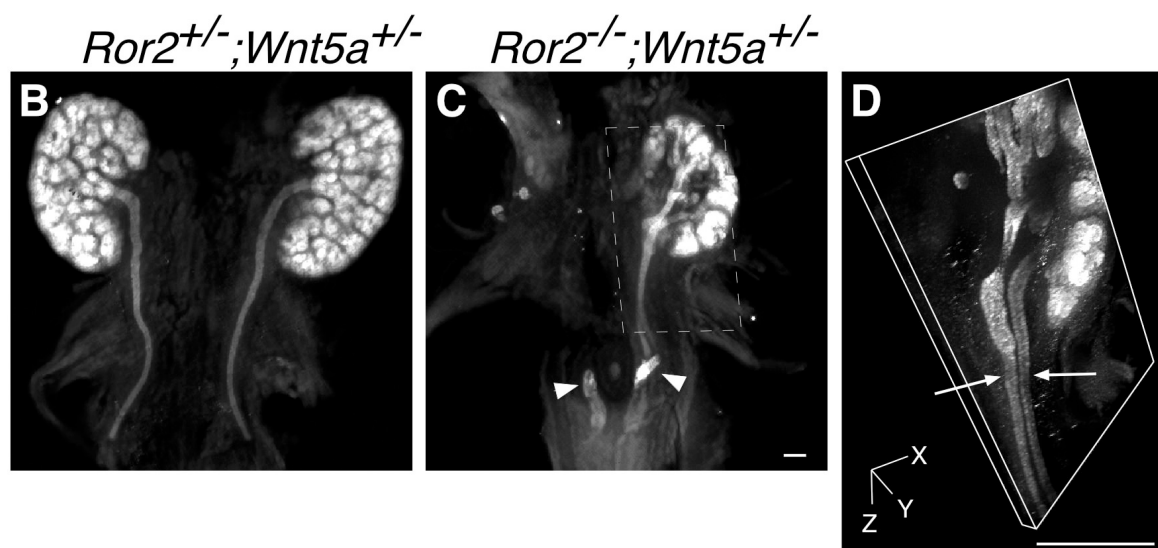

**Figure S4.** Genetic interactions between *Wnt5a* and *Ror2* during kidney development. Kidneys were isolated from embryos at E12.5 and subjected to anti-Pax2 whole-mount immunostaining. (A) The data represent the number of the embryos with the indicated kidney phenotypes. <sup>a</sup>All exhibited unilateral double ureter. <sup>b</sup>1 exhibited bilateral agenesis, 2 exhibited unilateral agenesis with single ureter on contralateral kidney, and 1 exhibited unilateral agenesis with double ureters in the contralateral kidney as shown in (C) and (D). (B) *Ror2*<sup>+/-</sup>;*Wnt5a*<sup>+/-</sup> kidneys with single ureter on either side. (D) shows the 3D image of the boxed region in (C). The arrowheads and arrows indicate the Wolffian duct stumps and ureters, respectively.

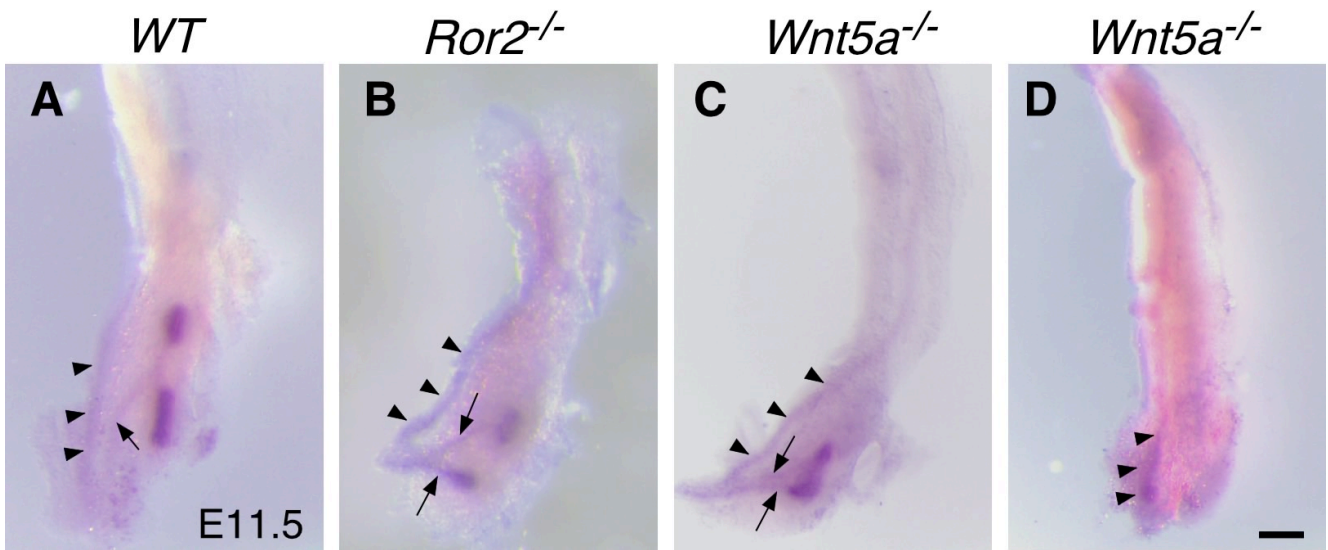

**Figure S5.** *Ret* expression is unaffected in *Ror2*<sup>-/-</sup> and *Wnt5a*<sup>-/-</sup> kidneys. Whole-mount *in situ* hybridization of kidneys (E11.5) with *Ret* anti-sense probe, showing its expression in the WD (arrowheads) and duplicated UBs (arrows) in *Ror2*<sup>-/-</sup> (B) and *Wnt5a*<sup>-/-</sup> (C) kidneys. *Ret* is also detected in the WD in *Wnt5a*<sup>-/-</sup> kidneys without UB outgrowth (D).

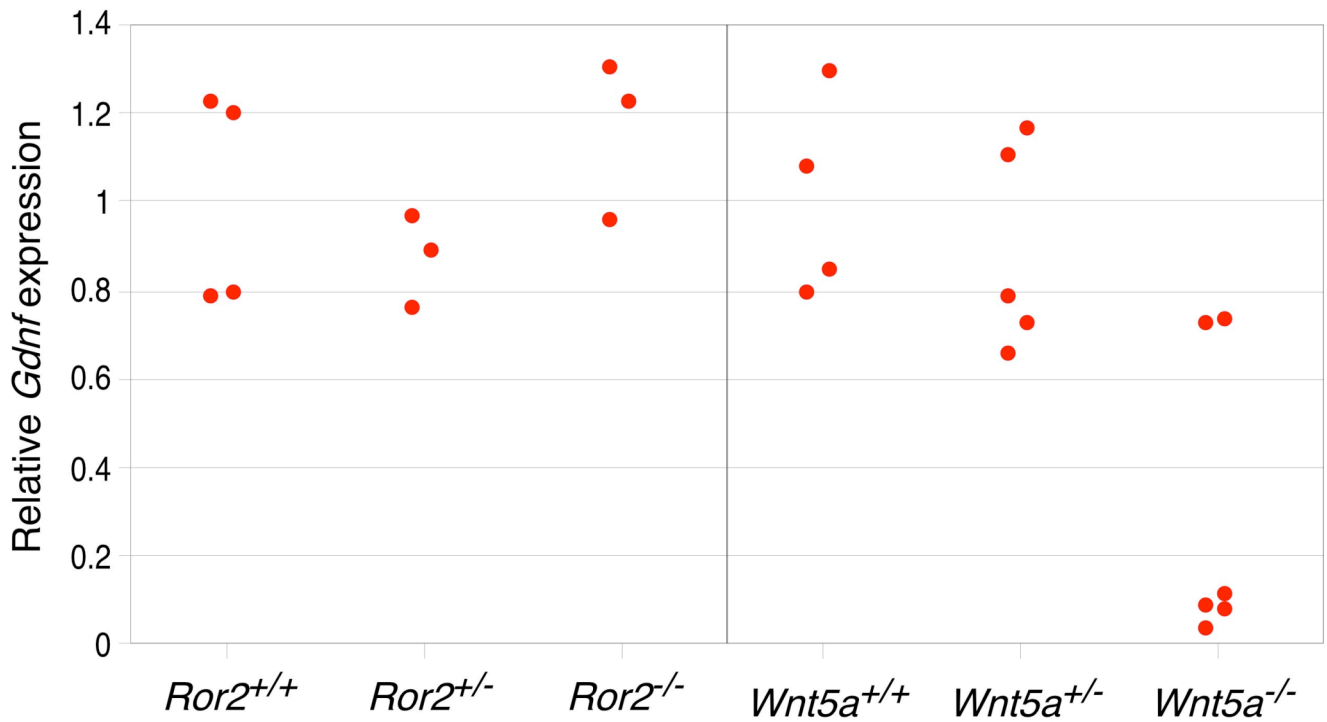

**Figure S6.** Quantitative RT-PCR analysis for *Gdnf* in *Ror2*- and *Wnt5a*-deficient kidneys. Kidneys were isolated from embryos with the indicated genotypes at E11.0 and subjected to quantitative RT-PCR analysis for *Gdnf*. Note that *Gdnf* expression is hardly detected in some *Wnt5a*<sup>-/-</sup> embryos (4 out of 6).

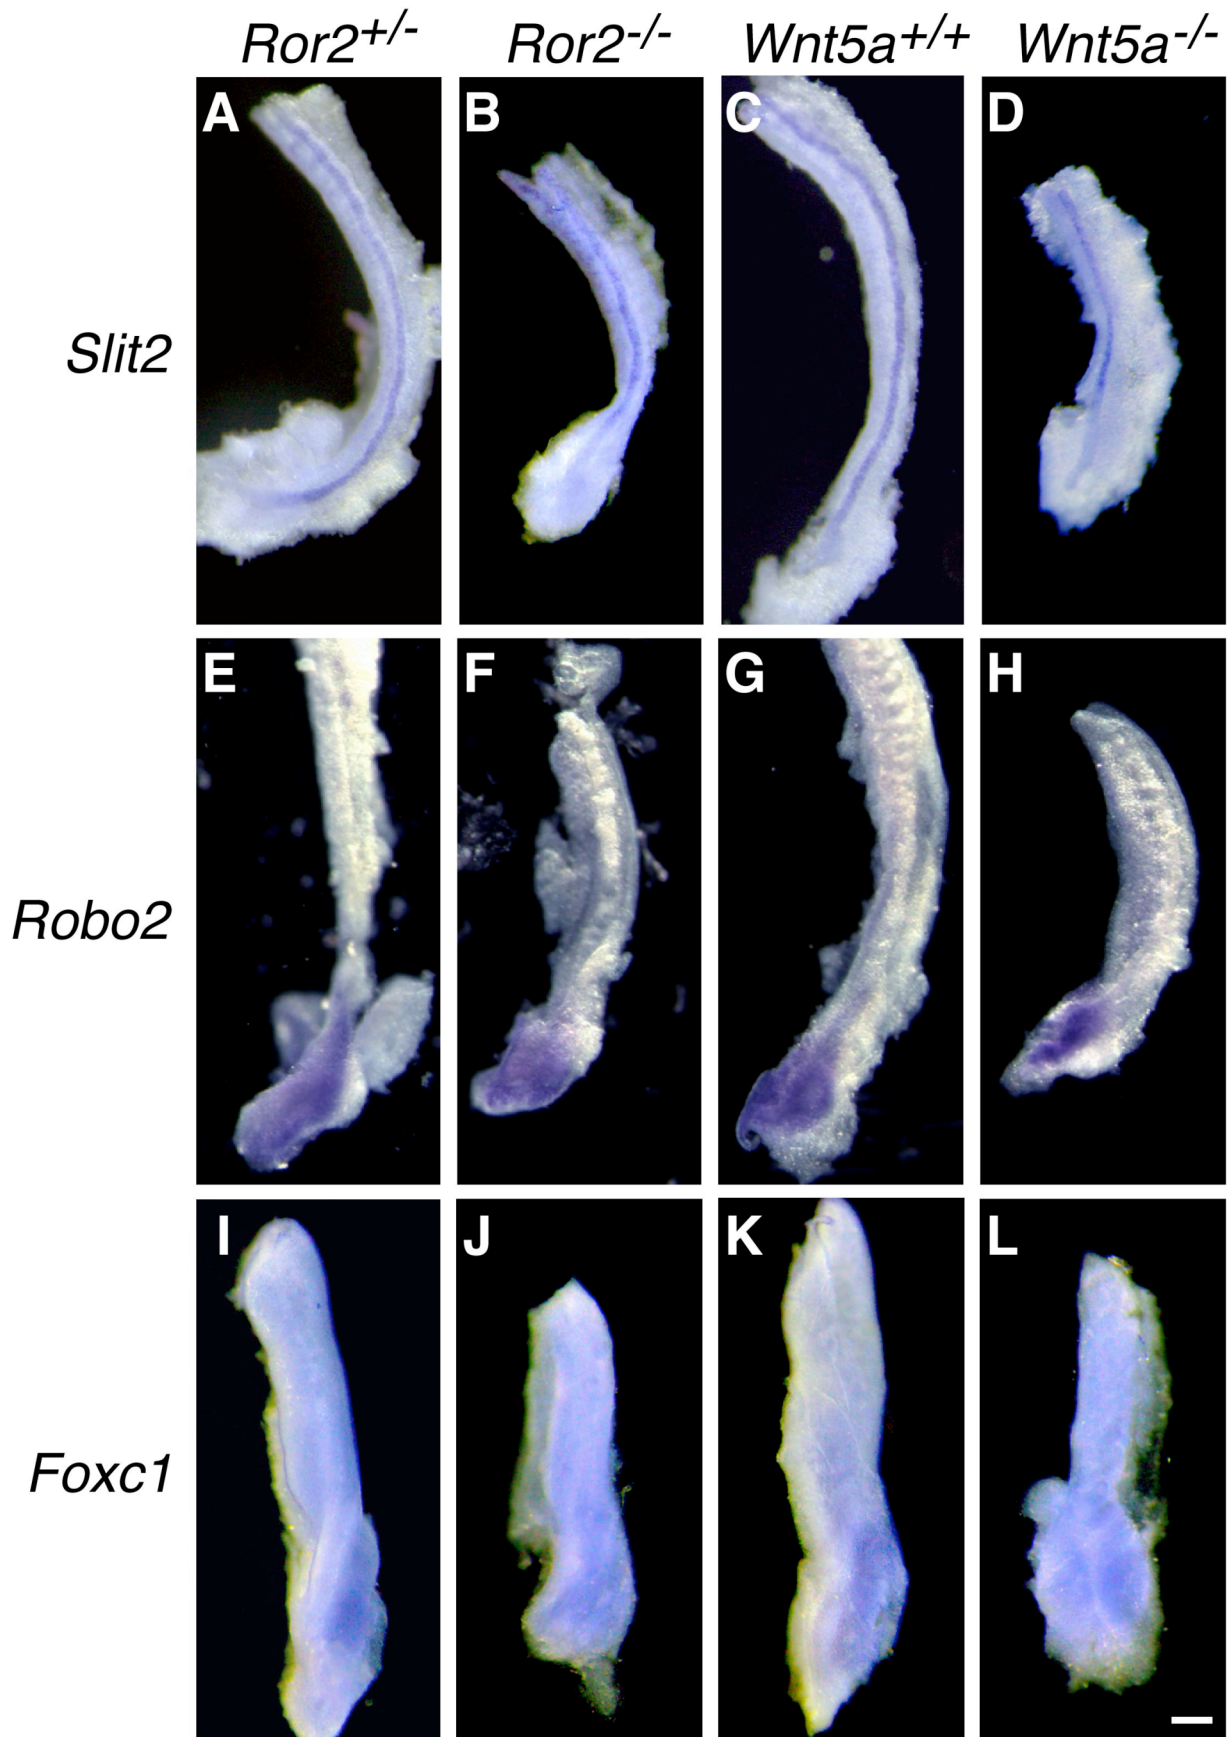

**Figure S7.** Expression of *Slit2*, *Robo2*, and *Foxc1* is unaffected in *Ror2*<sup>-</sup> and *Wnt5a*<sup>-</sup> deficient kidneys. Whole-mount *in situ* hybridization of kidneys (E10.5) with anti-sense probes for *Slit2* (A-D), *Robo2* (E-H), and *Foxc1* (I-L). *Slit2* is expressed throughout the WD, while expression of *Robo2* and *Foxc1* is widely detected in the metanephric region.
